# Supplementary material
Source: PubMed Central journal article supplement (PMC8781315)
Supplement: NEJMe2118471_disclosures.pdf [file NEJMe2118471_disclosures.pdf]

**Disclosure Purpose:** Editorial for 21-17995

## Summary of Interests

| Company or Organization                                                                                                                                                                             |                            |                                                                                                           |
|-----------------------------------------------------------------------------------------------------------------------------------------------------------------------------------------------------|----------------------------|-----------------------------------------------------------------------------------------------------------|
| Entity                                                                                                                                                                                              | Type                       | Interest Held By                                                                                          |
| <a href="#">Elsevier</a>                                                                                                                                                                            | Other                      | Self                                                                                                      |
| <i>Category:</i> Other<br><i>Additional Information:</i> Royalties on a textbook                                                                                                                    |                            | <i>Description:</i> Royalties on a Book                                                                   |
| <a href="#">Infectious Diseases Society of America</a>                                                                                                                                              | Other                      | Self                                                                                                      |
| <i>Category:</i> Other<br><i>Additional Information:</i> Spent several hours every day working on the journal. Was given a salary for the work.                                                     |                            | <i>Description:</i> Associate Editor of Clinical Infectious Diseases Journal                              |
| <a href="#">Moderna</a>                                                                                                                                                                             | Data And Safety Monitoring | Self                                                                                                      |
| <i>Category:</i> Data And Safety Monitoring<br><i>Additional Information:</i>                                                                                                                       |                            | <i>Description:</i> I provided lectures and didactic sessions regarding the licensure and use of vaccines |
| <a href="#">Pfizer Inc.</a>                                                                                                                                                                         | Data And Safety Monitoring | Self                                                                                                      |
| <i>Category:</i> Data And Safety Monitoring<br><i>Additional Information:</i> Spent hours reviewing the safety and efficacy of COVID vaccines in the 40,000 subjects enrolled into clinical trials. |                            | <i>Description:</i> Data Safety and Monitoring Board for COVID vaccine and RSV vaccine                    |
| <a href="#">PPD Development</a>                                                                                                                                                                     | Data And Safety Monitoring | Self                                                                                                      |
| <i>Category:</i> Data And Safety Monitoring<br><i>Additional Information:</i> Served on DSMB. Hourly rate was \$350/hour                                                                            |                            | <i>Description:</i> Monitored Vaccine Efficacy and Safety for Respiratory Vaccines                        |
| <a href="#">SANOFI US SERVICES INC.</a>                                                                                                                                                             | Data And Safety Monitoring | Self                                                                                                      |
| <i>Category:</i> Data And Safety Monitoring<br><i>Additional Information:</i> Hourly rate of \$350 per hour                                                                                         |                            | <i>Description:</i> Monitored safety of pneumococcal vaccines in children.                                |

## Certification

I certify that the information provided in this disclosure is complete and accurate.
